# Supplementary material for: Structural and functional insights into aldosterone synthase interaction with its redox partner protein adrenodoxin
Source: PubMed Central journal article supplement — J Biol Chem. 2021 May 18;296:100794. doi: 10.1016/j.jbc.2021.100794 (PMC8215293; doi:10.1016/j.jbc.2021.100794), 2021-05-18
Supplement: mmc1.pdf [file mmc1.pdf]

## Supporting Information

### **Structural and functional insights into aldosterone synthase interaction with its redox partner protein adrenodoxin Simone Brixius-Anderko<sup>1</sup> and Emily E. Scott<sup>1,2,#</sup>**

From the Departments of Medicinal Chemistry<sup>1</sup> and Pharmacology<sup>2</sup>, University of Michigan, Ann Arbor, MI  
48109, USA

#### **Table of contents:**

Figure S1: Protein purity by SDS-PAGE.

Figure S2: CYP11B2 catalysis.

Figure S3: Detail of CYP11B2/(R)-fadrozole active site.

Figure S4: Comparisons of fused and isolated proteins reveal few structural changes.

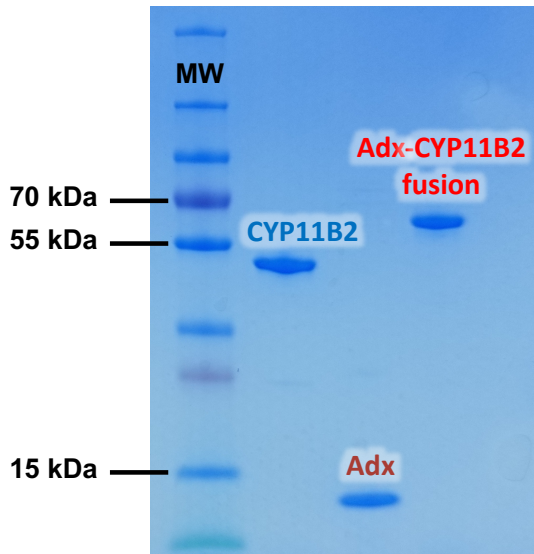

**Figure S1:** Protein purity by SDS-PAGE of purified proteins (CYP11B2, adrenodoxin, and adrenodoxin-CYP11B2 fusion protein) and molecular weight marker (left lane).

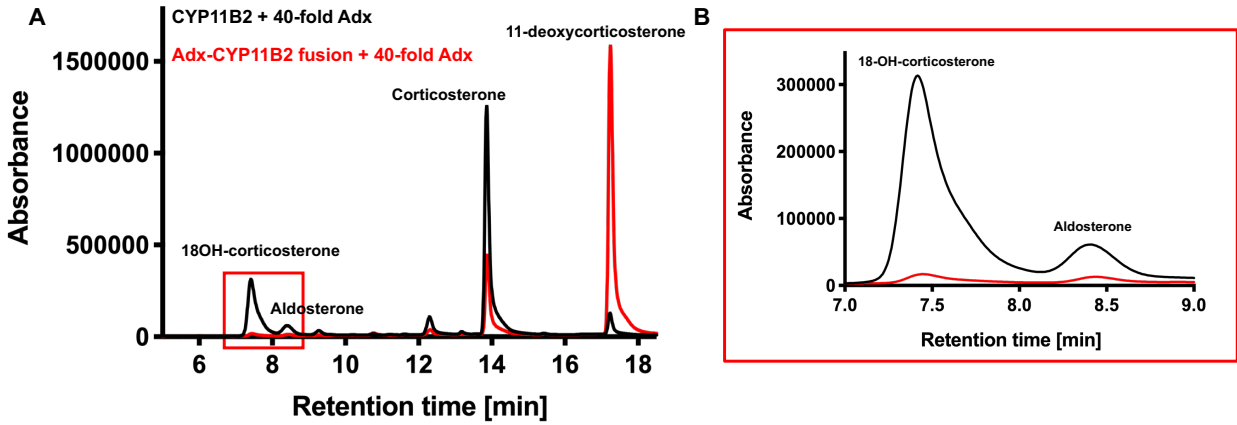

**Figure S2:** CYP11B2 catalysis. HPLC chromatogram of CYP11B2 (black line) and the adrenodoxin-CYP11B2 fusion protein (red line) conversion of 11-deoxycorticosterone to corticosterone, 18OH-corticosterone, and aldosterone (**A**) with focus on 18OH-corticosterone and aldosterone production (**B**).

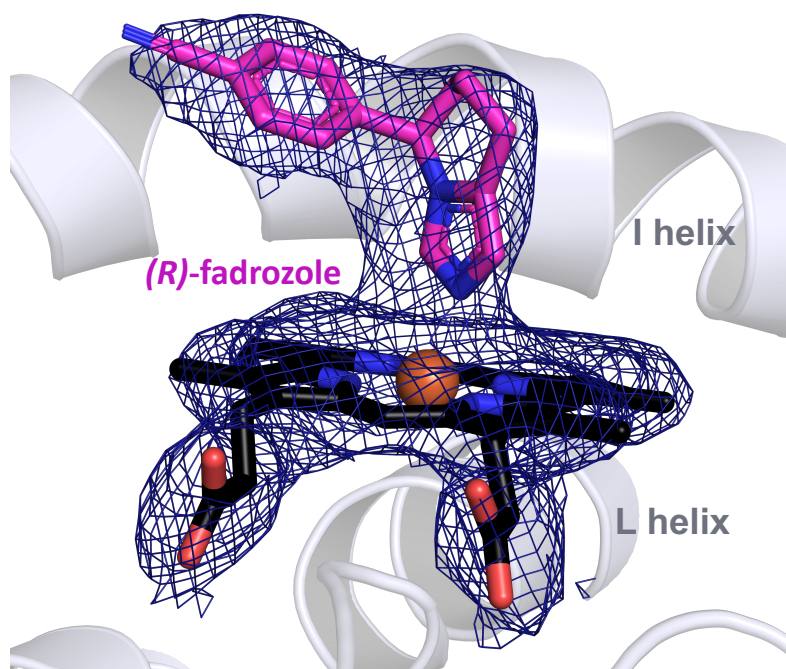

**Figure S3:** Detail of CYP11B2/(*R*)-fadrozole active site. The dark blue mesh shows electron density (simulated annealing/composite omit map) for the ligand (*R*)-fadrozole (magenta) and the heme prosthetic group in the CYP11B2 active site.



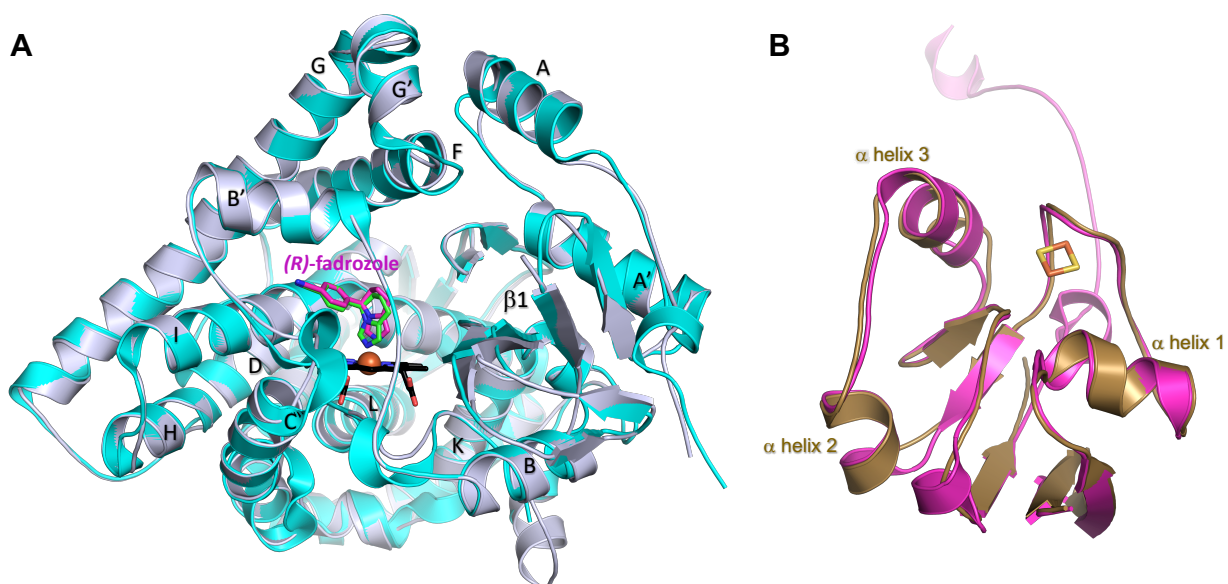

**Figure S4:** Comparisons of fused and isolated proteins reveal few structural changes. Comparison of CYP11B2 fused to adrenodoxin (light blue with *(R)*-fadrozole in magenta) with the isolated CYP11B2 enzyme (PDB 4FDH, cyan with *(R)*-fadrozole in green) yields a C $\alpha$  RMSD of 0.38 Å (A). Comparison of adrenodoxin fused to CYP11B2 (brown) with unfused adrenodoxin (PDB 3P1M, magenta) yields a C $\alpha$  RMSD of 0.53 Å (B).
